# Supplementary material for: Whole-exome sequencing of primary plasma cell leukemia discloses heterogeneous mutational patterns
Source: PubMed Central journal article supplement (PMC4627327; doi:10.18632/oncotarget.4028), 2015-05-25
Supplement: oncotarget-06-17543-s001.pdf [file oncotarget-06-17543-s001.pdf]

## SUPPLEMENTARY DATA

### WHOLE-EXOME CAPTURE AND SEQUENCING (WES)

Total genomic DNA samples were extracted using Wizard Genomic DNA Purification kit (Promega, Milan, Italy), quantified by ND-1000 spectrophotometer (NanoDrop Technologies, Wilmington, DE, USA) and stored at  $-20^{\circ}\text{C}$  until use. Starting from 1  $\mu\text{g}$  of genomic DNA per sample, library preparation and whole-exome capture for all the 12 PCL and five control samples were performed using the Illumina TruSeq DNA Sample Preparation kit and TruSeq Exome Enrichment kit (Illumina, San Diego, CA, USA), according to manufacturer's instructions. The Illumina TruSeq Exome Enrichment system is an in-liquido capture method based on biotinylated bait probes purposely designed to capture and isolate all the coding sequences of the human genome as well as a portion of flanking regions, for a total of 62 Mb. Briefly, 1  $\mu\text{g}$  of genomic DNA per sample was sheared using a Covaris S2 AFA instrument (Covaris, Woburn, MA, USA) and checked for fragmentation by microcapillary electrophoresis on Agilent 2100 BioAnalyzer (Agilent Technologies, Santa Clara, CA, USA). Then, genomic DNA library was prepared according to standard Illumina protocol, including end-repair, A-tailing, adapter ligation and PCR amplification. Next, whole-exome enrichment was carried out by two 20 hour-hybridizations with biotinylated capture baits, each followed by streptavidin magnetic bead binding and washing, and a final post-capture PCR amplification. The enriched libraries were loaded, one sample per lane, onto the Illumina cBot Cluster Generation System at a 8 pM final concentration, and then sequenced by Illumina GAIIx instrument in paired-end 85-cycle runs. For raw data processing, the Sequencing Control Software (SCS, Illumina) was used to convert raw image data into qseq files and then CASAVA software (Illumina) to generate final fastq files.

### WES DATA ANALYSIS

#### Variant calling

After fastq file quality control by using FastQC tool (<http://www.bioinformatics.babraham.ac.uk/projects/fastqc/>), we implemented a custom bioinformatics pipeline based on open-source tools for automation of read mapping and variant calling and annotation. Basically, whole-exome sequencing (WES) paired-end reads were mapped to the NCBI human reference genome GRCh37 using the Burrows-Wheeler Aligner [1] (BWA, v.0.7.5, <http://bio-bwa.sourceforge.net/>) with default parameters. The human reference genome was obtained from the GATK ftp site

(<http://ftp.broadinstitute.org>) to have a reference sequence already formatted for the correct execution of GATK. The data bundle v.2.5 was downloaded, including the human reference genome (b37 format, Standard 1000 Genomes fasta) with supercontigs (which were not considered for our analysis). After duplicate removal by Samtools (<http://samtools.sourceforge.net/>), GATK software [2] (v.2.5) was used to perform quality score recalibration (using the *TableRecalibration* walker), local realignment around known indels (using the *IndelRealigner* walker) and variant calling (by the *UnifiedGenotyper* walker) for both single nucleotide variants (SNVs) and insertions/deletions (indels) on the tumor samples. Poorly confident variants having QUAL < 150, Fisher Strand (FS) strand bias > 60 for SNV and > 200 for indels, or three SNVs within 10 base-windows were flagged for removal in the FILTER field of the VCF file.

#### Variant annotation

Finally, functional annotation and impact prediction were performed according to the Ensembl GenCode v67 transcript database, and using both Annovar tool [3] (v2013Nov17), which includes five damage predictors for non-synonymous SNVs (SIFT, Polyphen2, LRT, MutationTaster and Mutation Assessor), and SIFT Indel [4] for impact prediction of frameshifting indels.

#### Filtering

Since we were primarily interested in coding regions and splice sites, raw variants were progressively filtered to obtain a sub-selection of coding non-silent variants comprising both non-synonymous SNVs and indels. The following criteria were applied for filtering: (i) variant must be covered by least 10 reads (read depth  $\geq 10x$ ); (ii) variant must be mapped in coding regions or splice sites, according to Ensembl v67 functional annotation; (iii) allele frequency (AF) of non-reference alternate allele (ALT) is  $\geq 0.3$ ; (iv) variant is not present in NCBI dbSNP137 database (including also Phase I 1000 Genomes Project data) nor in NHLBI Exome Sequencing Project (ESP6500) database, or even if annotated as known polymorphism, it is also included in the Catalogue Of Somatic Mutations In Cancer (COSMIC, v67) or in the NCBI ClinVar database (database for rs with clinical associations); (v) variant is completely absent in our internal non-tumor WES database (to discard sequencing or analysis error-prone positions); (vi) variant is non-silent, namely a non-synonymous SNV or an indel. For indels, cross-check with public and internal databases was performed by comparing indel start positions extended of 5 bp on both sides to take into account possible overlapping calls.

### Selection of coding somatic non-syn SNVs and indels

Next, since we were interested into somatic variants, we used control samples to remove germline background and select tumor-specific non-silent variants. The analysis on control samples was restricted only to the genomic positions called as coding non-silent variants in tumor cases (according to the criteria above described). SNV calls were compared on punctual positions, while indel locations were extended of 5 bp on both sides to take into account possible overlapping calls. Basically, the five control samples were first considered and analyzed as a pool, by using the same GATK walkers used for tumor cases. When having few samples, this approach allows to be more confident on low frequency/quality calls, otherwise discarded in single-sample analysis. Then, for the five paired pPCLs having matched control (cases no. 016, 018, 019, 026, 038), variant calls for each sample were extracted from the pooled analysis and used separately for individual tumor-vs-control comparisons; conversely, for the seven unpaired pPCLs (cases no. 017, 020, 027, 030, 032, 035, 036), variant calls of the five controls were used as a unique pool. For the five paired pPCLs, we considered as “somatic”, and maintained, those coding non-syn SNVs and indels that: (i) have an ALT AF  $\geq 0.3$  in tumor sample; (ii) are absent in matched control sample, with at least 5x depth (flagged as SURE in Supplementary File S1); (iii) have an ALT AF  $< 0.2$  in matched control sample (with at least 5x depth) but at least doubled their AF in tumor as compared to control sample (ratio AF tumor/AF control  $\geq 2$ ) (flagged as CONFIDENT in Supplementary File S1). For the seven unpaired pPCLs, we considered as “somatic”, and maintained, those coding non-syn SNVs and indels that: (i) have an AF  $\geq 0.3$  in tumor sample; (ii) are completely absent in the control pool. As above described, SNVs were compared by punctual positions, while indels were extended of 5 bp on both sides to take into account overlapping calls.

### Identification of coding somatic sub-clonal variants

Since PCL is a notoriously heterogeneous disease, we evaluated the presence of somatic sub-clonal lesions in the five paired pPCLs. Since working below the thresholds commonly set for confident variant calling, this kind of analysis can be performed only on paired samples, which give the possibility to detect low frequency variants and to compare their AF in tumor with respect to normal counterpart in order to exclude sequencing errors and identify real sub-clonal events. Starting from the initial raw calls of the five paired pPCLs, we applied all the criteria aforementioned in the “Filtering paragraph”, with the only difference here, at step (iii), of keeping variants

with ALT AF  $< 0.3$ . Thus, we selected coding sub-clonal non-silent variants (sub-clonal non-syn SNVs and indels). Then, we removed germline background using the five matched control samples, which were first analyzed as a pool and then used as separate for individual tumor-vs-control comparisons (as described in the previous paragraph). The analysis on control samples was restricted only to the genomic positions called as coding sub-clonal non-silent variants in tumor cases. We considered as “somatic sub-clonal”, and maintained, those non-syn SNVs and indels that: (i) have an ALT AF  $< 0.3$  in tumor sample; (ii) are absent in matched control sample (flagged as SUBCLONAL SURE in Supplementary File S1); (iii) have an ALT AF  $< 0.1$  in its matched control (using the calls made starting from control pool) but at least doubled their AF in tumor as compared to control sample (ratio AF tumor/AF control  $\geq 2$ ) (flagged as SUBCLONAL CONFIDENT in Supplementary File S1). SNVs were compared by punctual positions, while indels were extended of 5 bp on both sides to take into account possible overlapping calls. In our experience, GATK is able to call variants with AF till to 0.1, in line with what confirmed by two recent papers [5, 6]. This AF range from 0.3 to 0.1 was our window for sub-clonal variant calling.

### COPY NUMBER ANALYSIS FROM WES DATA

Genome-wide analysis of somatic DNA copy number alterations (CNA) was performed starting from WES data using the read count-based EXCAVATOR software [7], with default parameters and setting  $c = 1$ . The five paired pPCLs (cases no. 016, 018, 019, 026, 038) were analyzed according to the “somatic” analysis mode by comparing each pPCL to its matched control sample, while the seven unpaired pPCLs (cases no. 017, 020, 027, 030, 032, 035, 036) were analyzed with the “pooling” modality by comparing each tumor to the pool of the five control samples. After a careful evaluation of the size of somatic CNAs resulting from the paired analyses, we decided to exclude any alterations less than 200 Kb in the unpaired analyses to filter out likely residual germline CNVs and focus on somatic CNAs. The Circos plot was used to summarize and represent CNA regions found in each pPCL according to a five copy number (CN) state code (ranging from 2-copy loss to 3-copy gain).

### PATHWAY ANALYSIS FOR MUTATED GENES

After removal of potentially spurious genes frequently mutated in cancer but not necessarily relevant to tumor biology [8], the mutated gene list ( $n = 1, 620$ ) was submitted to ToppGene Suite portal (<http://toppgene>

.cchmc.org) for functional enrichment analysis by using ToppFun application [9]. A  $p$ -value cut-off of 0.05 and FDR Benjamini-Hochberg (FDR B&H) correction method were applied to all the annotation terms in the default parameter set, and pathways with  $q$ -value  $< 0.05$  (FDR B&H correction) were defined as significantly enriched.

In addition, mutated genes identified in our pPCL dataset were catalogued according to a selection of eight biological pathways chosen on the basis of the already existing knowledge about MM and lymphoid tumor malignancies [10, 11]. The Kyoto Encyclopedia of Genes and Genomes (KEGG) database (<http://www.genome.jp/kegg/>) was used to retrieve the full lists of genes composing each pathway: proteasome (map#03050, 48 genes), spliceosome (map#03040, 120 genes), ubiquitin-mediated proteolysis (map#04120, 119 genes), TNF pathway (map#04688, 82 genes), NF- $\kappa$ B pathway (map#04064, 80 genes), PI3K-Akt pathway (map#04151, 221 genes), MAPK pathway (map#04010, 181 genes), Hippo pathway (map#04390, 83 genes). Genes were screened in our pPCLs using both official Gene Name and aliases, and assigned to a given pathway if presenting at least one coding somatic non-syn SNV or indel in at least one case.

## GENE EXPRESSION PROFILES OF MUTATED GENES IN 55 MM AND 21 PPCL DATASET

A panel of highly purified bone marrow plasma cells from 55 MM and 21 pPCL patients (12 of whom investigated in this study) and from four healthy donors were previously profiled by us on GeneChip Human Gene 1.0 ST array (Affymetrix, Santa Clara, CA, USA) [12]. MM samples were stratified in five groups according to the traditional cytogenetic classification [13, 14], as already reported [12]. Raw intensity expression values were processed by Robust Multi-array Average (RMA) procedure, using the re-annotated Chip Definition File from BrainArray libraries (version 18.0.0, available at <http://brainarray.mbni.med.umich.edu>). The most variable genes (2AVEFC) across the whole dataset were defined as those showing an average change in expression level at least 2-fold from the mean across the considered dataset, as previously reported [15]. Hierarchical agglomerative clustering was carried out using Pearson correlation and average as distance and linkage methods, respectively, in dChip software. Two-class supervised analysis was carried out using the Significance Analysis of Microarrays (SAM) software (version 4.00, Excel front-end publicly available at <http://www-stat.stanford.edu/Btibs/SAM/index.html>). The cut-off for statistical significance ( $q$ -value = 0) was determined by tuning the delta parameter

on the false discovery rate and controlling the  $q$ -value of the selected probes.

To assess the clustering abilities of the 132 most variable and mutated genes identified by our analysis, the biological homogeneity index (BHI) [16] provided in R package *clValid* was used. The expression values of these 132 genes were used to perform hierarchical clustering of the 55 MM-21 pPCL dataset obtaining seven sample groups, while tumor type and the classes of translocations were set as categories according to which homogeneity was measured using BHI index. Statistical significance was tested calculating BHI index on 1, 000 partitions into seven subgroups of the initial dataset obtained by random sampling of other 132 2AVEFC genes, not including the initial set of 132 most variable and mutated genes.

## REFERENCES

1. Li H, Durbin R. Fast and accurate short read alignment with Burrows-Wheeler transform. *Bioinformatics*. 2009; 25:1754–60.
2. DePristo MA, Banks E, Poplin R, Garimella KV, Maguire JR, Hartl C, Philippakis AA, del Angel G, Rivas MA, Hanna M, McKenna A, Fennell TJ, Kernysky AM, et al. A framework for variation discovery and genotyping using next-generation DNA sequencing data. *Nat Genet*. 2011; 43:491–498.
3. Wang K, Li M, Hakonarson H. ANNOVAR: functional annotation of genetic variants from high-throughput sequencing data. *Nucleic acids research*. 2010; 38:e164.
4. Hu J, Ng PC. Predicting the effects of frameshifting indels. *Genome biology*. 2012; 13:R9.
5. Xu H, DiCarlo J, Satya RV, Peng Q, Wang Y. Comparison of somatic mutation calling methods in amplicon and whole exome sequence data. *BMC genomics*. 2014; 15:244.
6. Spencer DH, Tyagi M, Vallania F, Bredemeyer AJ, Pfeifer JD, Mitra RD, Duncavage EJ. Performance of common analysis methods for detecting low-frequency single nucleotide variants in targeted next-generation sequence data. *The Journal of molecular diagnostics: JMD*. 2014; 16:75–88.
7. Magi A, Tattini L, Cifola I, D'Aurizio R, Benelli M, Mangano E, Battaglia C, Bonora E, Kurg A, Seri M, Magini P, Giusti B, Romeo G, et al. EXCAVATOR: detecting copy number variants from whole-exome sequencing data. *Genome Biol*. 2013; 14:R120.
8. Lawrence MS, Stojanov P, Polak P, Kryukov GV, Cibulskis K, Sivachenko A, Carter SL, Stewart C, Mermel CH, Roberts SA, Kiezun A, Hammerman PS, McKenna A, et al. Mutational heterogeneity in cancer and

- the search for new cancer-associated genes. *Nature*. 2013; 499:214–8.
9. Chen J, Bardes EE, Aronow BJ, Jegga AG. ToppGene Suite for gene list enrichment analysis and candidate gene prioritization. *Nucleic acids research*. 2009; 37:W305–11.
  10. Abdi J, Chen G, Chang H. Drug resistance in multiple myeloma: latest findings and new concepts on molecular mechanisms. *Oncotarget*. 2013; 4:2186–207.
  11. Bommert K, Bargou RC, Stühmer T. Signalling and survival pathways in multiple myeloma. *European journal of cancer*. 2006; 42:1574–80.
  12. Todoerti K, Agnelli L, Fabris S, Lionetti M, Tuana G, Mosca L, Lombardi L, Grieco V, Bianchino G, D’Auria F, Statuto T, Mazzocchi C, De Luca L, et al. Transcriptional characterization of a prospective series of primary plasma cell leukemia revealed signatures associated with tumor progression and poorer outcome. *Clin Cancer Res*. 2013; 19:3247–58.
  13. Agnelli L, Biccato S, Mattioli M, Fabris S, Intini D, Verdelli D, Baldini L, Morabito F, Callea V, Lombardi L, Neri A. Molecular classification of multiple myeloma: a distinct transcriptional profile characterizes patients expressing CCND1 and negative for 14q32 translocations. *Journal of clinical oncology*. 2005; 23:7296–306.
  14. Hideshima T, Bergsagel PL, Kuehl WM, Anderson KC. Advances in biology of multiple myeloma: clinical applications. *Blood*. 2004; 104:607–18.
  15. Mattioli M, Agnelli L, Fabris S, Baldini L, Morabito F, Biccato S, Verdelli D, Intini D, Nobili L, Cro L, Pruneri G, Callea V, Stelitano C, et al. Gene expression profiling of plasma cell dyscrasias reveals molecular patterns associated with distinct IGH translocations in multiple myeloma. *Oncogene*. 2005; 24:2461–73.
  16. Datta S, Datta S. Methods for evaluating clustering algorithms for gene expression data using a reference set of functional classes. *BMC bioinformatics*. 2006; 7:397.

**Supplementary Table S1. Whole-exome sequencing statistics.**

| Sample       | No. raw reads | No. uniquely mapped reads | No. mapped reads after dup removal | Mean read depth on target | Target coverage | Target coverage (at 10x) |
|--------------|---------------|---------------------------|------------------------------------|---------------------------|-----------------|--------------------------|
| PCL-016      | 110,272,584   | 106,445,251 (96.5%)       | 89,596,142 (81.2%)                 | 50.4x                     | 97.1%           | 91.5%                    |
| PCL-017      | 84,258,526    | 83,154,938 (98.6%)        | 69,269,562 (82.2%)                 | 35.3x                     | 96.7%           | 87.4%                    |
| PCL-018      | 92,253,590    | 90,678,466 (98.2%)        | 82,754,489 (89.7%)                 | 40.8x                     | 97.1%           | 89.3%                    |
| PCL-019      | 78,589,656    | 77,245,533 (98.2%)        | 70,705,473 (89.9%)                 | 37.6x                     | 96.9%           | 87.5%                    |
| PCL-020      | 122,929,488   | 121,165,743 (98.5%)       | 112,755,961 (91.7%)                | 50.6x                     | 97.7%           | 91.3%                    |
| PCL-026      | 76,134,384    | 74,597,368 (97.9%)        | 67,990,361 (89.3%)                 | 32.5x                     | 96.8%           | 87.1%                    |
| PCL-027      | 98,189,514    | 97,011,769 (98.8%)        | 79,048,609 (80.5%)                 | 42.5x                     | 97.0%           | 90.1%                    |
| PCL-030      | 95,130,580    | 93,779,211 (98.5%)        | 84,904,631 (89.2%)                 | 42.6x                     | 96.7%           | 89.2%                    |
| PCL-032      | 96,285,158    | 92,118,072 (95.6%)        | 76,863,539 (79.8%)                 | 39.9x                     | 96.8%           | 88.2%                    |
| PCL-035      | 90,835,438    | 89,744,765 (98.7%)        | 82,849,366 (91.2%)                 | 42.6x                     | 96.8%           | 90.1%                    |
| PCL-036      | 88,514,304    | 87,475,902 (98.8%)        | 77,571,653 (87.6%)                 | 40.4x                     | 97.0%           | 89.0%                    |
| PCL-038      | 108,860,542   | 107,692,450 (98.9%)       | 98,740,986 (90.7%)                 | 50.5x                     | 97.1%           | 91.4%                    |
| PCL-016 CTRL | 105,707,714   | 104,019,558 (98.4%)       | 91,154,951 (86.2%)                 | 47.8x                     | 97.2%           | 92.1%                    |
| PCL-018 CTRL | 80,980,836    | 79,894,617 (98.6%)        | 66,856,222 (82.5%)                 | 35.9x                     | 96.6%           | 87.7%                    |
| PCL-019 CTRL | 85,963,624    | 84,531,674 (98.3%)        | 70,913,619 (82.4%)                 | 39.0x                     | 97.0%           | 89.8%                    |
| PCL-026 CTRL | 82,031,414    | 80,110,921 (97.6%)        | 72,186,348 (87.9%)                 | 38.1x                     | 97.0%           | 89.9%                    |
| PCL-038 CTRL | 123,518,132   | 121,662,698 (98.4%)       | 103,777,057 (84.0%)                | 52.1x                     | 97.4%           | 92.4%                    |

**Supplementary Table S2. Single nucleotide variants (SNVs) and insertion/deletion (INDELs) counts by sample.**

| Sample  | SNVs      |               |        |                 |                            | INDELs    |               |        |                 |
|---------|-----------|---------------|--------|-----------------|----------------------------|-----------|---------------|--------|-----------------|
|         | Raw calls | Passed<br>10x | Coding | Novel<br>Coding | Novel<br>Coding<br>Non-syn | Raw calls | Passed<br>10x | Coding | Novel<br>Coding |
| PCL-016 | 49330     | 42882         | 18713  | 3277            | 1755                       | 5052      | 4638          | 256    | 106             |
| PCL-017 | 47048     | 37830         | 16373  | 2705            | 1409                       | 4435      | 3907          | 272    | 130             |
| PCL-018 | 48100     | 39959         | 17244  | 2834            | 1463                       | 4652      | 4177          | 274    | 133             |
| PCL-019 | 46853     | 38512         | 16832  | 2938            | 1588                       | 4575      | 4024          | 275    | 139             |
| PCL-020 | 47983     | 41292         | 18085  | 3007            | 1565                       | 4986      | 4573          | 288    | 144             |
| PCL-026 | 47489     | 37774         | 16367  | 2933            | 1579                       | 4434      | 3882          | 262    | 123             |
| PCL-027 | 48185     | 40804         | 17662  | 2825            | 1461                       | 4898      | 4401          | 295    | 136             |
| PCL-030 | 48009     | 40542         | 17609  | 2854            | 1499                       | 4900      | 4415          | 282    | 124             |
| PCL-032 | 46979     | 39390         | 17149  | 2795            | 1445                       | 4628      | 4131          | 263    | 113             |
| PCL-035 | 48580     | 41497         | 17997  | 3010            | 1548                       | 4946      | 4524          | 289    | 134             |
| PCL-036 | 47383     | 39829         | 17207  | 2774            | 1435                       | 4856      | 4402          | 297    | 139             |
| PCL-038 | 47370     | 40591         | 17633  | 2951            | 1552                       | 4777      | 4369          | 286    | 139             |

**Supplementary Table S3. Selected pathways found affected in our pPCL series and known to be involved in plasma cell dyscrasias.**

| Pathway                        | No. Affected genes (%) | No. pPCL (%) | No. Damaging/<br>Total variants | Genes                                                                                                                                                             |
|--------------------------------|------------------------|--------------|---------------------------------|-------------------------------------------------------------------------------------------------------------------------------------------------------------------|
| Proteasome                     | 1 (2%)                 | 1 (8%)       | 1/1                             | PSMC5                                                                                                                                                             |
| Spliceosome                    | 9 (7.5%)               | 9 (75%)      | 5/11                            | ACIN1, CRNKL1, CTNBL1, DDX42, HSPA8, NCBP1, SNRNP200, WBP11, XAB2                                                                                                 |
| Ubiquitin-mediated proteolysis | 9 (7.5%)               | 5 (42%)      | 6/10                            | BIRC2*, BRCA1, DDB2*, TRAF6, TRIM37, TRIP12, UBE3A, UBE4A, UBR5*                                                                                                  |
| TNF pathway                    | 8 (9.7%)               | 6 (50%)      | 5/8                             | CASP7*, CASP8, JUN, MAP3K5, NOD2, TNFRSF1A, TRAF2, TRAF3*                                                                                                         |
| NF-κB pathway                  | 8 (10%)                | 7 (58%)      | 5/11                            | ATM, BIRC2*, PIDD, TNFRSF11A, TNFRSF1A, TRAF2, TRAF3*, TRAF6                                                                                                      |
| PI3K-Akt pathway               | 25 (11.3%)             | 12 (100%)    | 19/32                           | BRCA1, CDKN1A, FN1, GHR, HGF*, HRAS, IL3RA, ITGA1, JAK1, KIT, KRAS, LAMA2, LAMA3, LAMA4, LAMA5, LAMB1, NRAS, PDGFB, PDGFRA, PDGFRB, PRLR, RELN, TLR2*, TP53, TSC2 |
| MAPK pathway                   | 22 (12.1%)             | 12 (100%)    | 21/27 <sup>†</sup>              | BDNF, BRAF, CACNA2D1, CACNA2D3, HRAS, HSPA8, JUN, KRAS, MAP3K5, MAPK8IP3, MAX*, MEF2C, MST1, NRAS, PDGFB, PDGFRA, PDGFRB, TGFBR2, TNFRSF1A, TP53, TRAF2, TRAF6    |
| Hippo pathway                  | 4 (4.8%)               | 3 (25%)      | 4/4                             | AREG, FZD10, FZD6, TGFBR2                                                                                                                                         |

The percentage of affected genes per pathway was calculated on the total number of genes included in each process, as defined from KEGG database.

\* Truncating variants (nonsense mutations or frameshift indels).

<sup>†</sup> Significant enrichment for damaging variants ( $q$ -value < 0.01, Bonferroni correction).

**Supplementary Table S4. Coding somatic variants in the panel of 11 genes recurrently mutated in multiple myeloma.**

| Gene name | no. affected PCLs | no. variants | Non-syn SNVs and indels by sample                                                                                                 | CN alterations across the 12 PCLs                                       | Same variant as previously reported in multiple myeloma                                  |
|-----------|-------------------|--------------|-----------------------------------------------------------------------------------------------------------------------------------|-------------------------------------------------------------------------|------------------------------------------------------------------------------------------|
| ACTG1     | -                 | -            | -                                                                                                                                 | -                                                                       |                                                                                          |
| BRAF      | 1                 | 2            | PCL-026 (D594N <sup>†</sup> , E586K <sup>†</sup> )                                                                                | -                                                                       | Boyd <i>et al.</i> , BJH 2011 (D594N); Bolli <i>et al.</i> , Nat Commun 2014 (E586K)     |
| CYLD      | -                 | -            | -                                                                                                                                 | -                                                                       |                                                                                          |
| DIS3      | 3                 | 2            | PCL-019 (R780K <sup>†</sup> ), PCL-035 (R780T), PCL-036 (H764R <sup>Δ</sup> )                                                     | 1-copy loss in 8 PCLs (016, 017, 018, 026, 030, 032, 036, 038)          | Walker <i>et al.</i> , Blood 2012 (R780K); Lohr <i>et al.</i> , Cancer Cell 2014 (R780T) |
| FAM46C    | 1                 | 1            | PCL-027 (S156F)                                                                                                                   | 1-copy loss in 5 PCLs (017, 019, 032, 036, 038)                         |                                                                                          |
| KRAS      | 1                 | 1            | PCL-038 (G12R <sup>†</sup> )                                                                                                      | 1-copy loss in PCL-030                                                  | Walker <i>et al.</i> , Blood 2012 (G12R)                                                 |
| NRAS      | 1                 | 1            | PCL-027 (Q61H <sup>†</sup> )                                                                                                      | 1-copy loss in 5 PCLs (017, 019, 032, 036, 038), 1-copy gain in PCL-027 | Chapman <i>et al.</i> , Nature 2011 (Q61H)                                               |
| PRDM1     | -                 | -            | -                                                                                                                                 | -                                                                       |                                                                                          |
| RB1       | -                 | -            | -                                                                                                                                 | -                                                                       |                                                                                          |
| TP53      | 4                 | 4            | PCL-018 (P278L <sup>Δ†</sup> ), PCL-027 (I195T <sup>Δ†</sup> ), PCL-030 (R273C <sup>Δ†</sup> ), PCL-017 (332fs*del <sup>Δ</sup> ) | 1-copy loss in 5 PCLs (017, 018, 019, 027, 030)                         |                                                                                          |
| TRAF3     | 1                 | 1            | PCL-032 (C21fs*del <sup>Δ</sup> )                                                                                                 | 2-copy loss in PCL-017, 1-copy loss in PCL-032                          |                                                                                          |

CN state was evaluated only for those genes affected by at least one coding somatic non-silent variant (non-syn SNV or indel) in our dataset.

**Legend:** <sup>Δ</sup> variants in homozygous state <sup>†</sup> variants reported as somatic in COSMIC (v67) for other tumors.



**Supplementary Table S5. List of the 132 most variable and mutated genes.** Functional enrichment in Gene Ontology (GO) functional annotation terms is reported as calculated by DAVID v6.7 software (Enrichment Score > 1.3).

| Gene symbol | Gene name                                                            | GO functional enrichment                                                                                                                                                                              |
|-------------|----------------------------------------------------------------------|-------------------------------------------------------------------------------------------------------------------------------------------------------------------------------------------------------|
| ABCB4       | ATP-binding cassette, sub-family B (MDR/TAP), member 4               | GOTERM_CC: integral to plasma membrane (GO:0005887)                                                                                                                                                   |
| ADAMTS15    | ADAM metallopeptidase with thrombospondin type 1 motif, 15           | GOTERM_CC: proteinaceous extracellular matrix (GO:0005578)                                                                                                                                            |
| ADRB2       | adrenergic, beta-2-, receptor, surface                               | GOTERM_BP: positive regulation of developmental process (GO:0051094); GOTERM_BP: endocytosis (GO:0006897); GOTERM_CC: integral to plasma membrane (GO:0005887)                                        |
| AMPD1       | adenosine monophosphate deaminase 1 (isoform M)                      |                                                                                                                                                                                                       |
| ANG         | angiogenin, ribonuclease, RNase A family, 5                          | GOTERM_CC: proteinaceous extracellular matrix (GO:0005578); GOTERM_MF: cytoskeletal protein binding (GO:0008092)                                                                                      |
| APH1B       | anterior pharynx defective 1 homolog B (C. elegans)                  |                                                                                                                                                                                                       |
| ARHGAP15    | Rho GTPase activating protein 15                                     |                                                                                                                                                                                                       |
| ARHGAP31    | Cdc42 GTPase-activating protein                                      |                                                                                                                                                                                                       |
| ASPM        | asp (abnormal spindle) homolog, microcephaly associated (Drosophila) |                                                                                                                                                                                                       |
| ATRNL1      | attractin-like 1                                                     |                                                                                                                                                                                                       |
| BAI3        | brain-specific angiogenesis inhibitor 3                              |                                                                                                                                                                                                       |
| BTLA        | B and T lymphocyte associated                                        | GOTERM_CC: integral to plasma membrane (GO:0005887)                                                                                                                                                   |
| C17orf47    | chromosome 17 open reading frame 47                                  |                                                                                                                                                                                                       |
| CABLES1     | Cdk5 and Abl enzyme substrate 1                                      |                                                                                                                                                                                                       |
| CARD6       | caspase recruitment domain family, member 6                          |                                                                                                                                                                                                       |
| CCSER1      | coiled-coil serine-rich protein 1                                    |                                                                                                                                                                                                       |
| CD36        | CD36 molecule (thrombospondin receptor)                              | GOTERM_BP: positive regulation of developmental process (GO:0051094); GOTERM_BP: cell adhesion (GO:0007155); GOTERM_BP: endocytosis (GO:0006897); GOTERM_CC: integral to plasma membrane (GO:0005887) |
| CFI         | complement factor I                                                  |                                                                                                                                                                                                       |
| CHSY3       | chondroitin sulfate synthase 3                                       |                                                                                                                                                                                                       |
| CLSTN2      | calsyntenin 2                                                        | GOTERM_BP: cell adhesion (GO:0007155)                                                                                                                                                                 |
| COBLL1      | COBL-like 1                                                          |                                                                                                                                                                                                       |

(Continued)

| Gene symbol | Gene name                                                          | GO functional enrichment                                                                                                                      |
|-------------|--------------------------------------------------------------------|-----------------------------------------------------------------------------------------------------------------------------------------------|
| COL1A2      | collagen, type I, alpha 2                                          | GOTERM_BP: extracellular structure organization (GO:0043062); GOTERM_CC: proteinaceous extracellular matrix (GO:0005578)                      |
| CPNE8       | copine VIII                                                        |                                                                                                                                               |
| CRYZ        | crystallin, zeta (quinone reductase)                               |                                                                                                                                               |
| CYBB        | cytochrome b-245, beta polypeptide                                 | GOTERM_CC: integral to plasma membrane (GO:0005887)                                                                                           |
| DAB2        | disabled homolog 2, mitogen-responsive phosphoprotein (Drosophila) | GOTERM_BP: cell morphogenesis (GO:0000902); GOTERM_BP: endocytosis (GO:0006897)                                                               |
| DAPK1       | death-associated protein kinase 1                                  |                                                                                                                                               |
| DDX60       | DEAD (Asp-Glu-Ala-Asp) box polypeptide 60                          |                                                                                                                                               |
| DLGAP5      | discs, large (Drosophila) homolog-associated protein 5             | GOTERM_MF: phosphoprotein phosphatase activity (GO:0004721)                                                                                   |
| DOCK4       | dedicator of cytokinesis 4                                         |                                                                                                                                               |
| DUSP4       | dual specificity phosphatase 4                                     | GOTERM_MF: phosphoprotein phosphatase activity (GO:0004721)                                                                                   |
| EML5        | echinoderm microtubule associated protein like 5                   |                                                                                                                                               |
| ETV1        | ets variant 1                                                      |                                                                                                                                               |
| FAM129A     | family with sequence similarity 129, member A                      |                                                                                                                                               |
| FAM171A1    | family with sequence similarity 171, member A1                     |                                                                                                                                               |
| FAM5C       | family with sequence similarity 5, member C                        |                                                                                                                                               |
| FAT4        | FAT tumor suppressor homolog 4 (Drosophila)                        | GOTERM_BP: cell adhesion (GO:0007155)                                                                                                         |
| FLNB        | filamin B, beta (actin binding protein 278)                        | GOTERM_MF: cytoskeletal protein binding (GO:0008092)                                                                                          |
| FN1         | fibronectin 1                                                      | GOTERM_BP: cell morphogenesis (GO:0000902); GOTERM_BP: cell adhesion (GO:0007155); GOTERM_CC: proteinaceous extracellular matrix (GO:0005578) |
| FNBP1       | formin binding protein 1                                           | GOTERM_BP: endocytosis (GO:0006897)                                                                                                           |
| GABRG1      | gamma-aminobutyric acid (GABA) A receptor, gamma 1                 |                                                                                                                                               |
| GBA3        | glucosidase, beta, acid 3 (cytosolic)                              |                                                                                                                                               |
| GBP4        | guanylate binding protein 4                                        |                                                                                                                                               |
| GLUL        | glutamate-ammonia ligase (glutamine synthetase)                    |                                                                                                                                               |
| GRAMD3      | GRAM domain containing 3                                           |                                                                                                                                               |
| GREB1       | GREB1 protein                                                      |                                                                                                                                               |
| HGF         | hepatocyte growth factor (hepapoietin A; scatter factor)           | GOTERM_BP: cell morphogenesis (GO:0000902)                                                                                                    |

(Continued)

| Gene symbol | Gene name                                                            | GO functional enrichment                                                                                                                                                                                                             |
|-------------|----------------------------------------------------------------------|--------------------------------------------------------------------------------------------------------------------------------------------------------------------------------------------------------------------------------------|
| HIST1H2BK   | histone cluster 1, H2bk                                              |                                                                                                                                                                                                                                      |
| HSPA4L      | heat shock 70kDa protein 4-like                                      |                                                                                                                                                                                                                                      |
| KCNA5       | potassium voltage-gated channel, shaker-related subfamily, member 5  | GOTERM_CC: integral to plasma membrane (GO:0005887)                                                                                                                                                                                  |
| KIAA1598    | KIAA1598                                                             |                                                                                                                                                                                                                                      |
| KIT         | v-kit Hardy-Zuckerman 4 feline sarcoma viral oncogene homolog        | GOTERM_BP: positive regulation of developmental process (GO:0051094)                                                                                                                                                                 |
| KMO         | kynurenine 3-monooxygenase (kynurenine 3-hydroxylase)                |                                                                                                                                                                                                                                      |
| LAMA2       | laminin, alpha 2                                                     | GOTERM_BP: cell adhesion (GO:0007155); GOTERM_CC: proteinaceous extracellular matrix (GO:0005578)                                                                                                                                    |
| LEPREL1     | leprecan-like 1                                                      |                                                                                                                                                                                                                                      |
| LGALS3BP    | lectin, galactoside-binding, soluble, 3 binding protein              | GOTERM_BP: cell adhesion (GO:0007155); GOTERM_CC: proteinaceous extracellular matrix (GO:0005578)                                                                                                                                    |
| LIFR        | leukemia inhibitory factor receptor alpha                            | GOTERM_BP: cell morphogenesis (GO:0000902); GOTERM_CC: integral to plasma membrane (GO:0005887)                                                                                                                                      |
| LPHN3       | latrophilin 3                                                        |                                                                                                                                                                                                                                      |
| LRMP        | lymphoid-restricted membrane protein                                 | GOTERM_CC: integral to plasma membrane (GO:0005887)                                                                                                                                                                                  |
| LRP12       | low density lipoprotein-related protein 12                           | GOTERM_BP: endocytosis (GO:0006897); GOTERM_CC: integral to plasma membrane (GO:0005887)                                                                                                                                             |
| MAGEC1      | melanoma antigen family C, 1                                         |                                                                                                                                                                                                                                      |
| MAGI2       | membrane associated guanylate kinase, WW and PDZ domain containing 2 |                                                                                                                                                                                                                                      |
| MAP1B       | microtubule-associated protein 1B                                    | GOTERM_BP: positive regulation of developmental process (GO:0051094); GOTERM_BP: cell morphogenesis (GO:0000902); GOTERM_BP: extracellular structure organization (GO:0043062); GOTERM_MF: cytoskeletal protein binding (GO:0008092) |
| MBOAT1      | membrane bound O-acyltransferase domain containing 1                 |                                                                                                                                                                                                                                      |
| MLIP        | muscular LMNA-interacting protein                                    |                                                                                                                                                                                                                                      |
| MSC         | musculin (activated B-cell factor-1)                                 |                                                                                                                                                                                                                                      |
| MUC15       | mucin 15, cell surface associated                                    |                                                                                                                                                                                                                                      |
| MYBL1       | v-myb myeloblastosis viral oncogene homolog (avian)-like 1           |                                                                                                                                                                                                                                      |

(Continued)

| Gene symbol | Gene name                                                                                    | GO functional enrichment                                                                                                                                                                                                                                                                                                         |
|-------------|----------------------------------------------------------------------------------------------|----------------------------------------------------------------------------------------------------------------------------------------------------------------------------------------------------------------------------------------------------------------------------------------------------------------------------------|
| MYO1B       | myosin IB                                                                                    | GOTERM_MF: cytoskeletal protein binding (GO:0008092)                                                                                                                                                                                                                                                                             |
| NAP1L3      | nucleosome assembly protein 1-like 3                                                         |                                                                                                                                                                                                                                                                                                                                  |
| NEB         | nebulin                                                                                      | GOTERM_MF: cytoskeletal protein binding (GO:0008092)                                                                                                                                                                                                                                                                             |
| NLGN4X      | neuroligin 4, X-linked                                                                       | GOTERM_BP: cell adhesion (GO:0007155); GOTERM_CC: integral to plasma membrane (GO:0005887); GOTERM_BP: extracellular structure organization (GO:0043062)                                                                                                                                                                         |
| NRCAM       | neuronal cell adhesion molecule                                                              | GOTERM_BP: positive regulation of developmental process (GO:0051094); GOTERM_BP: cell morphogenesis (GO:0000902); GOTERM_BP: cell adhesion (GO:0007155); GOTERM_CC: integral to plasma membrane (GO:0005887); GOTERM_BP: extracellular structure organization (GO:0043062); GOTERM_MF: cytoskeletal protein binding (GO:0008092) |
| NTRK3       | neurotrophic tyrosine kinase, receptor, type 3                                               | GOTERM_BP: positive regulation of developmental process (GO:0051094); GOTERM_CC: integral to plasma membrane (GO:0005887)                                                                                                                                                                                                        |
| NXPE1       | neurexophilin and PC-esterase domain family, member 1                                        |                                                                                                                                                                                                                                                                                                                                  |
| P4HA1       | prolyl 4-hydroxylase, alpha polypeptide I                                                    | GOTERM_BP: extracellular structure organization (GO:0043062)                                                                                                                                                                                                                                                                     |
| PCDH20      | protocadherin 20                                                                             | GOTERM_BP: cell adhesion (GO:0007155)                                                                                                                                                                                                                                                                                            |
| PDIA2       | protein disulfide isomerase family A, member 2                                               |                                                                                                                                                                                                                                                                                                                                  |
| PDLIM3      | PDZ and LIM domain 3                                                                         | GOTERM_MF: cytoskeletal protein binding (GO:0008092)                                                                                                                                                                                                                                                                             |
| PER1        | period homolog 1 (Drosophila)                                                                |                                                                                                                                                                                                                                                                                                                                  |
| PLBD1       | phospholipase B domain containing 1                                                          |                                                                                                                                                                                                                                                                                                                                  |
| PLCB1       | phospholipase C, beta 1 (phosphoinositide-specific)                                          |                                                                                                                                                                                                                                                                                                                                  |
| PLCL1       | phospholipase C-like 1                                                                       |                                                                                                                                                                                                                                                                                                                                  |
| PNP         | nucleoside phosphorylase                                                                     | GOTERM_BP: positive regulation of developmental process (GO:0051094)                                                                                                                                                                                                                                                             |
| PRDM5       | PR domain containing 5                                                                       |                                                                                                                                                                                                                                                                                                                                  |
| PTCH1       | patched homolog 1 (Drosophila)                                                               | GOTERM_CC: integral to plasma membrane (GO:0005887)                                                                                                                                                                                                                                                                              |
| PTGDR       | prostaglandin D2 receptor (DP)                                                               |                                                                                                                                                                                                                                                                                                                                  |
| PTPN13      | protein tyrosine phosphatase, non-receptor type 13 (APO-1/CD95 (Fas)-associated phosphatase) | GOTERM_MF: phosphoprotein phosphatase activity (GO:0004721)                                                                                                                                                                                                                                                                      |

(Continued)

| Gene symbol | Gene name                                                                                                        | GO functional enrichment                                                                                                                                                                                                      |
|-------------|------------------------------------------------------------------------------------------------------------------|-------------------------------------------------------------------------------------------------------------------------------------------------------------------------------------------------------------------------------|
| PTPRC       | protein tyrosine phosphatase, receptor type, C                                                                   | GOTERM_BP: positive regulation of developmental process (GO:0051094); GOTERM_MF: phosphoprotein phosphatase activity (GO:0004721); GOTERM_BP: cell adhesion (GO:0007155); GOTERM_CC: integral to plasma membrane (GO:0005887) |
| PTPRG       | protein tyrosine phosphatase, receptor type, G                                                                   | GOTERM_MF: phosphoprotein phosphatase activity (GO:0004721); GOTERM_CC: integral to plasma membrane (GO:0005887)                                                                                                              |
| PTPRZ1      | protein tyrosine phosphatase, receptor-type, Z polypeptide 1                                                     | GOTERM_BP: cell morphogenesis (GO:0000902); GOTERM_MF: phosphoprotein phosphatase activity (GO:0004721); GOTERM_CC: integral to plasma membrane (GO:0005887); GOTERM_CC: proteinaceous extracellular matrix (GO:0005578)      |
| PXDN        | peroxidasin homolog (Drosophila)                                                                                 |                                                                                                                                                                                                                               |
| QPCT        | glutaminy-peptide cyclotransferase                                                                               |                                                                                                                                                                                                                               |
| RAPGEF4     | Rap guanine nucleotide exchange factor (GEF) 4                                                                   |                                                                                                                                                                                                                               |
| RELN        | reelin                                                                                                           | GOTERM_BP: cell morphogenesis (GO:0000902); GOTERM_BP: cell adhesion (GO:0007155); GOTERM_CC: proteinaceous extracellular matrix (GO:0005578)                                                                                 |
| ROBO1       | roundabout, axon guidance receptor, homolog 1 (Drosophila); similar to roundabout 1 isoform b                    | GOTERM_BP: positive regulation of developmental process (GO:0051094); GOTERM_BP: cell morphogenesis (GO:0000902); GOTERM_BP: cell adhesion (GO:0007155); GOTERM_CC: integral to plasma membrane (GO:0005887)                  |
| SAMD3       | sterile alpha motif domain containing 3                                                                          |                                                                                                                                                                                                                               |
| SCN9A       | sodium channel, voltage-gated, type IX, alpha subunit                                                            | GOTERM_CC: integral to plasma membrane (GO:0005887)                                                                                                                                                                           |
| SEMA3A      | sema domain, immunoglobulin domain (Ig), short basic domain, secreted, (semaphorin) 3A                           | GOTERM_BP: cell morphogenesis (GO:0000902)                                                                                                                                                                                    |
| SEMA4A      | sema domain, immunoglobulin domain (Ig), transmembrane domain (TM) and short cytoplasmic domain, (semaphorin) 4A |                                                                                                                                                                                                                               |
| SEMA7A      | semaphorin 7A, GPI membrane anchor (John Milton Hagen blood group)                                               |                                                                                                                                                                                                                               |
| SEPT10      | septin 10                                                                                                        |                                                                                                                                                                                                                               |
| SLA         | Src-like-adaptor                                                                                                 |                                                                                                                                                                                                                               |
| SLAMF1      | signaling lymphocytic activation molecule family member 1                                                        |                                                                                                                                                                                                                               |
| SLC15A2     | solute carrier family 15 (H+/peptide transporter), member 2                                                      | GOTERM_CC: integral to plasma membrane (GO:0005887)                                                                                                                                                                           |

(Continued)

| Gene symbol | Gene name                                                                | GO functional enrichment                                                                                                                                       |
|-------------|--------------------------------------------------------------------------|----------------------------------------------------------------------------------------------------------------------------------------------------------------|
| SLC25A27    | solute carrier family 25, member 27                                      | -                                                                                                                                                              |
| SLC40A1     | solute carrier family 40 (iron-regulated transporter), member 1          | GOTERM_CC: integral to plasma membrane (GO:0005887)                                                                                                            |
| SLC9A9      | solute carrier family 9 (sodium/hydrogen exchanger), member 9            |                                                                                                                                                                |
| SLFN11      | schlafen family member 11                                                |                                                                                                                                                                |
| SLIT2       | slit homolog 2 (Drosophila)                                              | GOTERM_BP: positive regulation of developmental process (GO:0051094); GOTERM_BP: cell morphogenesis (GO:0000902)                                               |
| SNX9        | sorting nexin 9                                                          |                                                                                                                                                                |
| SPG20       | spastic paraplegia 20 (Troyer syndrome)                                  |                                                                                                                                                                |
| SPOCK2      | sparc/osteonectin, cwcv and kazal-like domains proteoglycan (testican) 2 | GOTERM_BP: extracellular structure organization (GO:0043062); GOTERM_CC: proteinaceous extracellular matrix (GO:0005578)                                       |
| ST14        | suppression of tumorigenicity 14 (colon carcinoma)                       | GOTERM_CC: integral to plasma membrane (GO:0005887)                                                                                                            |
| SYNM        | synemin, intermediate filament protein                                   | GOTERM_MF: cytoskeletal protein binding (GO:0008092)                                                                                                           |
| TEX101      | testis expressed 101                                                     |                                                                                                                                                                |
| TGFBR2      | transforming growth factor, beta receptor II (70/80kDa)                  | GOTERM_BP: positive regulation of developmental process (GO:0051094); GOTERM_BP: endocytosis (GO:0006897); GOTERM_CC: integral to plasma membrane (GO:0005887) |
| TPTE*       | transmembrane phosphatase with tensin homology                           | GOTERM_MF: phosphoprotein phosphatase activity (GO:0004721)                                                                                                    |
| TPX2        | TPX2, microtubule-associated, homolog (Xenopus laevis)                   |                                                                                                                                                                |
| TRPM3       | transient receptor potential cation channel, subfamily M, member 3       |                                                                                                                                                                |
| TTN*        | titin                                                                    | GOTERM_MF: cytoskeletal protein binding (GO:0008092)                                                                                                           |
| TXLNB       | taxilin beta                                                             |                                                                                                                                                                |
| UGT2A1      | UDP glucuronosyltransferase 2 family, polypeptide A1                     |                                                                                                                                                                |
| USH2A       | Usher syndrome 2A (autosomal recessive, mild)                            | GOTERM_CC: proteinaceous extracellular matrix (GO:0005578)                                                                                                     |
| USP6NL      | USP6 N-terminal like                                                     |                                                                                                                                                                |
| VWDE        | von Willebrand factor D and EGF domains                                  |                                                                                                                                                                |
| WDR17       | WD repeat domain 17                                                      |                                                                                                                                                                |

(Continued)

| Gene symbol | Gene name               | GO functional enrichment |
|-------------|-------------------------|--------------------------|
| ZNF154      | zinc finger protein 154 |                          |
| ZNF165      | zinc finger protein 165 |                          |
| ZNF559      | zinc finger protein 559 |                          |
| ZNF83       | zinc finger protein 83  |                          |
| ZNF860      | zinc finger protein 860 |                          |

**Note:** \* according to Lawrence et al. (Nature 2013), these could be potentially spurious genes frequently found mutated in cancer but not necessarily relevant to tumor biology.

**Supplementary Table S6. List of the 102 mutated genes found as differentially expressed (DEGs) in 21 pPCL versus 55 MM comparison, by SAM supervised analysis.** Significant DEGs ( $q$ -value = 0) are listed according to SAM score. Expression fold change in PCL vs MM group is reported. Up- and down-regulated genes belonging to the functionally enriched transcription regulation (T) and apoptosis (A) biological processes, respectively, are indicated.

| Gene symbol | Gene name                                                                             | Cytoband    | Score(d) | Fold change | Functional enrichment |
|-------------|---------------------------------------------------------------------------------------|-------------|----------|-------------|-----------------------|
| USP36       | ubiquitin specific peptidase 36                                                       | 17q25.3     | 5.67     | 1.60        | -                     |
| LGALS3      | lectin, galactoside-binding, soluble, 3                                               | 14q21-q22   | 5.03     | 2.15        | -                     |
| NFKBIE      | nuclear factor of kappa light polypeptide gene enhancer in B-cells inhibitor, epsilon | 6p21.1      | 4.72     | 2.06        | -                     |
| PER1        | period homolog 1 (Drosophila)                                                         | 17p13.1-p12 | 4.25     | 2.57        | T                     |
| FAM53B      | family with sequence similarity 53, member B                                          | 10q26.13    | 4.16     | 1.98        | -                     |
| LSS         | lanosterol synthase (2,3-oxidosqualene-lanosterol cyclase)                            | 21q22.3     | 4.07     | 1.52        | -                     |
| ZMIZ2       | zinc finger, MIZ-type containing 2                                                    | 7p13        | 3.92     | 1.50        | T                     |
| WDR44       | WD repeat domain 44                                                                   | Xq24        | 3.86     | 1.63        | -                     |
| TOX2        | TOX high mobility group box family member 2                                           | 20q13.12    | 3.81     | 1.76        | T                     |
| HIVEP1      | human immunodeficiency virus type I enhancer binding protein 1                        | 6p24-p22.3  | 3.64     | 1.65        | T                     |
| MFSD10      | major facilitator superfamily domain containing 10                                    | 4p16.3      | 3.61     | 1.43        | -                     |
| ESYT1       | family with sequence similarity 62 (C2 domain containing), member A                   | 12q13.2     | 3.57     | 1.60        | -                     |
| RNF19B      | ring finger protein 19B                                                               | 1p35.1      | 3.50     | 1.74        | -                     |
| MSC         | musculin (activated B-cell factor-1)                                                  | 8q21        | 3.48     | 1.93        | T                     |
| ZNF43       | zinc finger protein 43                                                                | 19p13.1-p12 | 3.47     | 1.71        | T                     |
| WBP11       | WW domain binding protein 11                                                          | 12p12.3     | 3.38     | 1.67        | -                     |

(Continued)



| Gene symbol | Gene name                                                       | Cytoband  | Score(d) | Fold change | Functional enrichment |
|-------------|-----------------------------------------------------------------|-----------|----------|-------------|-----------------------|
| FAM129A     | family with sequence similarity 129, member A                   | 1q25      | 3.35     | 2.24        | -                     |
| PPIF        | peptidylprolyl isomerase F                                      | 10q22-q23 | 3.31     | 1.51        | -                     |
| HGS         | hepatocyte growth factor-regulated tyrosine kinase substrate    | 17q25     | 3.28     | 1.31        | -                     |
| SLC20A1     | solute carrier family 20 (phosphate transporter), member 1      | 2q11-q14  | 3.28     | 1.57        | -                     |
| MAPK8IP3    | mitogen-activated protein kinase 8 interacting protein 3        | 16p13.3   | 3.25     | 1.38        | -                     |
| ZNF777      | zinc finger protein 777                                         | 7q36.1    | 3.25     | 1.34        | T                     |
| ADNP2       | ADNP homeobox 2                                                 | 18q23     | 3.11     | 1.59        | T                     |
| VAV2        | vav 2 guanine nucleotide exchange factor                        | 9q34.1    | 3.06     | 1.56        | -                     |
| FAM179A     | family with sequence similarity 179, member A                   | 2p23.2    | 3.06     | 1.30        | -                     |
| FUS         | fusion (involved in t(12;16) in malignant liposarcoma)          | 16p11.2   | 3.05     | 1.29        | -                     |
| RARA        | retinoic acid receptor, alpha                                   | 17q21     | 3.05     | 1.37        | T                     |
| NDE1        | nudE nuclear distribution gene E homolog 1 (A. nidulans)        | 16p13.11  | 3.04     | 1.35        | -                     |
| PLEC        | plectin 1                                                       | 8q24      | 3.03     | 1.46        | -                     |
| PRDM2       | PR domain containing 2, with ZNF domain                         | 1p36.21   | 2.97     | 1.50        | T                     |
| CCNK        | cyclin K                                                        | 14q32     | 2.96     | 1.39        | T                     |
| LRRFIP1     | leucine rich repeat (in FLII) interacting protein 1             | 2q37.3    | 2.94     | 1.55        | T                     |
| COBLL1      | COBL-like 1                                                     | 2q24.3    | 2.94     | 1.90        | -                     |
| ZNF687      | zinc finger protein 687                                         | 1q21.2    | 2.93     | 1.41        | T                     |
| MAP1B       | microtubule-associated protein 1B                               | 5q13      | 2.92     | 2.18        | -                     |
| USP14       | ubiquitin specific peptidase 14 (tRNA-guanine transglycosylase) | 18p11.32  | 2.89     | 1.35        | -                     |

(Continued)

| Gene symbol | Gene name                                                                        | Cytoband    | Score(d) | Fold change | Functional enrichment |
|-------------|----------------------------------------------------------------------------------|-------------|----------|-------------|-----------------------|
| UHRF1BP1    | UHRF1 binding protein 1                                                          | 6p21        | 2.87     | 1.41        | -                     |
| CEP112      | centrosomal protein 112kDa                                                       | 17q24.1     | 2.86     | 1.39        | -                     |
| BATF3       | basic leucine zipper transcription factor, ATF-like 3                            | 1q32.3      | 2.84     | 1.46        | T                     |
| STX4        | syntaxin 4                                                                       | 16p11.2     | 2.84     | 1.27        | -                     |
| CCNY        | cyclin Y                                                                         | 10p11.21    | 2.82     | 1.24        | -                     |
| EP300       | E1A binding protein p300                                                         | 22q13.2     | 2.82     | 1.34        | T                     |
| SLC33A1     | solute carrier family 33 (acetyl-CoA transporter), member 1                      | 3q25.31     | -2.65    | 0.65        | A                     |
| TMEM117     | transmembrane protein 117                                                        | 12q12       | -2.66    | 0.74        | -                     |
| MEF2C       | myocyte enhancer factor 2C                                                       | 5q14        | -2.66    | 0.67        | A                     |
| IPO11       | importin 11                                                                      | 5q12.1      | -2.67    | 0.67        | -                     |
| CEACAM1     | carcinoembryonic antigen-related cell adhesion molecule 1 (biliary glycoprotein) | 19q13.2     | -2.67    | 0.61        | -                     |
| PLBD1       | phospholipase B domain containing 1                                              | 12p13.1     | -2.67    | 0.54        | -                     |
| TIMD4       | T-cell immunoglobulin and mucin domain containing 4                              | 5q33.3      | -2.68    | 0.65        | -                     |
| ZFP3        | zinc finger protein 3 homolog (mouse)                                            | 17p13.2     | -2.73    | 0.62        | -                     |
| CHEK2       | checkpoint kinase 2                                                              | 22q12.1     | -2.73    | 0.71        | A                     |
| PLCG2       | phospholipase C, gamma 2 (phosphatidylinositol-specific)                         | 16q24.1     | -2.74    | 0.67        | A                     |
| HIST1H2BC   | histone cluster 1, H2bc                                                          | 6p21.3      | -2.75    | 0.61        | -                     |
| DISP1       | dispatched homolog 1 (Drosophila)                                                | 1q41        | -2.80    | 0.70        | -                     |
| BLZF1       | basic leucine zipper nuclear factor 1                                            | 1q24        | -2.81    | 0.65        | -                     |
| HMMR        | hyaluronan-mediated motility receptor (RHAMM)                                    | 5q33.2-qter | -2.82    | 0.66        | -                     |

(Continued)

| Gene symbol | Gene name                                                  | Cytoband  | Score(d) | Fold change | Functional enrichment |
|-------------|------------------------------------------------------------|-----------|----------|-------------|-----------------------|
| ZNF233      | zinc finger protein 233                                    | 19q13.31  | -2.82    | 0.62        | -                     |
| TTC14       | tetratricopeptide repeat domain 14                         | 3q26.33   | -2.83    | 0.66        | -                     |
| ZNF302      | zinc finger protein 302                                    | 19q13.11  | -2.83    | 0.63        | -                     |
| PLD1        | phospholipase D1, phosphatidylcholine-specific             | 3q26      | -2.86    | 0.70        | -                     |
| ABCD3       | ATP-binding cassette, sub-family D (ALD), member 3         | 1p22-p21  | -2.89    | 0.64        | -                     |
| FAM46C      | family with sequence similarity 46, member C               | 1p12      | -2.90    | 0.70        | -                     |
| RNASEL      | ribonuclease L (2',5'-oligoadenylate synthetase-dependent) | 1q25      | -2.93    | 0.63        | -                     |
| MAN2A1      | mannosidase, alpha, class 2A, member 1                     | 5q21-q22  | -2.99    | 0.69        | -                     |
| ASXL2       | additional sex combs like 2 (Drosophila)                   | 2p24.1    | -3.01    | 0.63        | -                     |
| KLHL6       | kelch-like 6 (Drosophila)                                  |           | -3.02    | 0.60        | -                     |
| RAPGEF4     | Rap guanine nucleotide exchange factor (GEF) 4             | 2q31-q32  | -3.03    | 0.50        | -                     |
| FXR2        | fragile X mental retardation, autosomal homolog 2          | 17p13.1   | -3.05    | 0.73        | -                     |
| DLGAP5      | discs, large (Drosophila) homolog-associated protein 5     | 14q22.3   | -3.08    | 0.55        | -                     |
| WDR73       | WD repeat domain 73                                        | 15q25.2   | -3.09    | 0.74        | -                     |
| TM7SF3      | transmembrane 7 superfamily member 3                       | 12q11-q12 | -3.11    | 0.69        | -                     |
| TCAIM       | T cell activation inhibitor, mitochondrial                 | 3p21.31   | -3.11    | 0.61        | -                     |
| RFESD       | Rieske (Fe-S) domain containing                            | 5q15      | -3.11    | 0.65        | -                     |
| MGAM        | maltase-glucoamylase (alpha-glucosidase)                   | 7q34      | -3.13    | 0.59        | -                     |
| ADAL        | adenosine deaminase-like                                   | 15q15.3   | -3.15    | 0.61        | -                     |
| BTN3A3      | butyrophilin, subfamily 3, member A3                       | 6p21.3    | -3.16    | 0.57        | -                     |

(Continued)

| Gene symbol | Gene name                                                   | Cytoband      | Score(d) | Fold change | Functional enrichment |
|-------------|-------------------------------------------------------------|---------------|----------|-------------|-----------------------|
| QPCT        | glutaminy-peptide cyclotransferase                          | 2p22.2        | -3.17    | 0.28        | -                     |
| DNAJC10     | DnaJ (Hsp40) homolog, subfamily C, member 10                | 2q32.1        | -3.18    | 0.67        | -                     |
| MLEC        | malectin                                                    | 12q24.31      | -3.23    | 0.63        | -                     |
| SLC15A2     | solute carrier family 15 (H+/peptide transporter), member 2 | 3q13.33       | -3.26    | 0.46        | -                     |
| ANKRD42     | ankyrin repeat domain 42                                    | 11q14.1       | -3.29    | 0.67        | -                     |
| RELN        | reelin                                                      | 7q22          | -3.33    | 0.37        | -                     |
| ITSN1       | intersectin 1 (SH3 domain protein)                          | 21q22.1-q22.2 | -3.33    | 0.57        | A                     |
| NXPE1       | neurexophilin and PC-esterase domain family, member 1       | 11q23.2       | -3.33    | 0.48        | -                     |
| HS2ST1      | heparan sulfate 2-O-sulfotransferase 1                      | 1p31.1-p22.1  | -3.34    | 0.59        | -                     |
| CHSY3       | chondroitin sulfate synthase 3                              | 5q23.3        | -3.34    | 0.44        | -                     |
| MIXL1       | Mix1 homeobox-like 1 (Xenopus laevis)                       | 1q42.12       | -3.42    | 0.59        | -                     |
| DLC1        | deleted in liver cancer 1                                   | 8p22          | -3.49    | 0.53        | A                     |
| DGKI        | diacylglycerol kinase, iota                                 | 7q32.3-q33    | -3.52    | 0.58        | -                     |
| AMPD1       | adenosine monophosphate deaminase 1 (isoform M)             | 1p13          | -3.60    | 0.34        | -                     |
| ATM         | ATM serine/threonine kinase (Ataxia telangiectasia mutated) | 11q22-q23     | -3.64    | 0.52        | A                     |
| CPNE5       | copine V                                                    | 6p21.1        | -3.66    | 0.67        | -                     |
| FAM111A     | family with sequence similarity 111, member A               | 11q12.1       | -3.72    | 0.59        | -                     |
| APH1B       | anterior pharynx defective 1 homolog B (C. elegans)         | 15q22.2       | -3.73    | 0.47        | A                     |
| KIAA0040    | KIAA0040                                                    | 1q24-q25      | -3.74    | 0.62        | -                     |
| FKTN        | fukutin                                                     | 9q31-q33      | -3.98    | 0.58        | -                     |
| CD36        | CD36 molecule (thrombospondin receptor)                     | 7q11.2        | -4.09    | 0.46        | -                     |

(Continued)

| Gene symbol | Gene name                                             | Cytoband | Score(d) | Fold change | Functional enrichment |
|-------------|-------------------------------------------------------|----------|----------|-------------|-----------------------|
| DENND5B     | DENN/MADD domain containing 5B                        | 12p11.21 | -4.48    | 0.57        | -                     |
| AKD1        | adenylate kinase domain containing 1                  | 6q21     | -4.49    | 0.61        | -                     |
| KMO         | kynurenine 3-monooxygenase (kynurenine 3-hydroxylase) | 1q42-q44 | -4.54    | 0.36        | -                     |
| ZNF860      | zinc finger protein 860                               | 3p23     | -4.64    | 0.31        | -                     |
| SLFN11      | schlafen family member 11                             | 17q12    | -4.86    | 0.34        | -                     |

**Supplementary Table S7. Clinical and molecular data of primary plasma cell leukemia cases included in the study.**

| Case    | Age (yr) | Sex | PP | del(13q) | del(17p) | 1q gain | t(11;14) | t(4;14) | t(14;16) | t(14;20) | c-MYC rearrangement |
|---------|----------|-----|----|----------|----------|---------|----------|---------|----------|----------|---------------------|
| PCL-016 | 57       | F   | Gκ | 1        | 0        | 1       | 0        | 0       | 1        | 0        | 0                   |
| PCL-017 | 68       | F   | Gκ | 1        | 1        | 1       | 0        | 0       | 1        | 0        | 1                   |
| PCL-018 | 59       | F   | κ  | 1        | 1        | 0       | 1        | 0       | 0        | 0        | 0                   |
| PCL-019 | 67       | F   | Mκ | 1        | 1        | 1       | 0        | 0       | 1        | 0        | 0                   |
| PCL-020 | 79       | F   | Gλ | 0        | 0        | 1       | 0        | 0       | 0        | 0        | 0                   |
| PCL-026 | 59       | M   | Gκ | 1        | 0        | 1       | 0        | 0       | 1        | 0        | 1                   |
| PCL-027 | 65       | M   | λ  | 0        | 1        | 0       | 1        | 0       | 0        | 0        | 0                   |
| PCL-030 | 52       | F   | κ  | 1        | 1        | 0       | 0        | 0       | 0        | 1        | 0                   |
| PCL-032 | 65       | F   | Gκ | 1        | 0        | 1       | 0        | 1       | 0        | 0        | na                  |
| PCL-035 | 76       | F   | κ  | 0        | 0        | 0       | 1        | 0       | 0        | 0        | 0                   |
| PCL-036 | 71       | M   | Gκ | 1        | 0        | 0       | 1        | 0       | 0        | 0        | 0                   |
| PCL-038 | 58       | M   | Gκ | 1        | 0        | 1       | 0        | 0       | 0        | 0        | na                  |

**Legend:** F, female; M, male; PP, paraprotein; 0, negative; 1, positive; na, not available.

**Supplementary Table S8. Estimation of possible carry-over of germline variants when not having matched controls.** The five paired pPCL samples were analyzed in both “paired” (subtracting to each tumor its matched control, standard mode) and “unpaired” manner (subtracting to each tumor the pool of the other not matched controls). Only the calls passing all our filtering steps described in Suppl Methods and having  $AF \geq 0.3$  in tumor were considered. Count comparison between the two analysis modes was performed on non-synonymous SNVs classified as “SURE” (zero alternate reads in control sample, see Supplementary File S1) and not included subclonal variants.

| Sample  | Paired analysis | Unpaired analysis |
|---------|-----------------|-------------------|
| PCL-016 | 146             | 147               |
| PCL-018 | 19              | 21                |
| PCL-019 | 105             | 105               |
| PCL-026 | 224             | 225               |
| PCL-038 | 30              | 31                |
| Total   | 524             | 529               |

**Supplementary Table S9. Identical recurrent variants found in two or more samples and annotated in both dbSNP137 and COSMIC catalogue (v67).** Check for somatic status as reported in COSMIC website. In COSMIC website, variants are flagged as somatic if confirmed in paired samples or previously reported in literature as somatic; viceversa, variants have a flag “unknown” if normal tissue was not available or not tested (somatic status not confirmed).

| Gene Name | Chr_Start    | Samples                         | no. Samples | Flag           | dbSNP137 rsID | COSMIC ID (v67)          | Somatic Status in COSMIC website       |
|-----------|--------------|---------------------------------|-------------|----------------|---------------|--------------------------|----------------------------------------|
| ACACB     | 12_109692053 | PCL-020*PCL-027                 | 2           | Unpaired_SNV   | rs17848835    | COSM1358599, COSM1358600 | unknown                                |
| BPIFB6    | 20_31619500  | PCL-030*PCL-017*PCL-035*PCL-032 | 4           | Unpaired_SNV   | rs17301126    | COSM443647               | unknown                                |
| C16orf96  | 16_4625470   | PCL-020*PCL-030                 | 2           | Unpaired_SNV   | rs77379438    | COSM435266               | unknown                                |
| CGN       | 1_151502427  | PCL-030*PCL-032                 | 2           | Unpaired_SNV   | rs34834099    | COSM1560000              | unknown                                |
| CIDEC     | 3_9918811    | PCL-030*PCL-017*PCL-035         | 3           | Unpaired_SNV   | rs61742367    | COSM1178476              | Confirmed somatic                      |
| CLSTN2    | 3_140178381  | PCL-036*PCL-020                 | 2           | Unpaired_SNV   | rs17348572    | COSM149480               | unknown                                |
| DTX2      | 7_76111831   | PCL-020*PCL-035                 | 2           | Unpaired_SNV   | rs150857694   | COSM150315               | unknown                                |
| EHD4      | 15_42235316  | PCL-036*PCL-035                 | 2           | Unpaired_SNV   | rs11549015    | COSM147887               | Previously reported                    |
| EPPK1     | 8_144942413  | PCL-036*PCL-017                 | 2           | Unpaired_SNV   | rs201641573   | COSM1330245              | unknown                                |
| ERICH1    | 8_623696     | PCL-030*PCL-032                 | 2           | Unpaired_SNV   | rs61741834    | COSM328225               | unknown                                |
| EVC       | 4_5731074    | PCL-017*PCL-032                 | 2           | Unpaired_SNV   | rs16837598    | COSM1618937              | Confirmed somatic                      |
| EYS       | 6_65301787   | PCL-030*PCL-017                 | 2           | Unpaired_SNV   | rs12663622    | COSM150116               | unknown                                |
| FAM166B   | 9_35562393   | PCL-036*PCL-035                 | 2           | Unpaired_INDEL | rs142582869   | COSM288596               | Confirmed somatic, Previously reported |
| FAM179A   | 2_29246044   | PCL-036*PCL-020*PCL-027*PCL-032 | 4           | Unpaired_SNV   | rs6721861     | COSM442782               | unknown                                |
| FAM186A   | 12_50744581  | PCL-036*PCL-020*PCL-030         | 3           | Unpaired_SNV   | rs73108300    | COSM468487               | Confirmed somatic                      |

(Continued)



| Gene Name | Chr_Start   | Samples                 | no. Samples | Flag           | dbSNP137 rsID | COSMIC ID (v67)        | Somatic Status in COSMIC website       |
|-----------|-------------|-------------------------|-------------|----------------|---------------|------------------------|----------------------------------------|
| HLA-DQA1  | 6_32609296  | PCL-030*PCL-017         | 2           | Unpaired_INDEL | rs9282026     | COSM1443636            | Previously reported                    |
| HLA-DQA1  | 6_32609299  | PCL-030*PCL-017         | 2           | Unpaired_INDEL | rs199556640   | COSM1443637            | Previously reported                    |
| IGFN1     | 1_201180100 | PCL-027*PCL-017         | 2           | Unpaired_SNV   | rs4915223     | COSM146727             | unknown                                |
| IGFN1     | 1_201180340 | PCL-027*PCL-017         | 2           | Unpaired_SNV   | rs139390045   | COSM146728             | unknown                                |
| KIT       | 4_55593464  | PCL-020*PCL-030         | 2           | Unpaired_SNV   | rs3822214     | COSM28026              | Confirmed somatic, Previously reported |
| LEFTY1    | 1_226076669 | PCL-036*PCL-030         | 2           | Unpaired_SNV   | rs41310561    | COSM425442             | unknown                                |
| MCF2L2    | 3_183056598 | PCL-020*PCL-035         | 2           | Unpaired_SNV   | rs12632177    | COSM1421202            | unknown                                |
| MUC4      | 3_195506005 | PCL-020*PCL-035         | 2           | Unpaired_SNV   | rs202017381   | COSM1042837            | Confirmed somatic                      |
| MUC4      | 3_195509606 | PCL-020*PCL-035         | 2           | Unpaired_SNV   | rs200244334   | COSM1485020            | unknown                                |
| OR12D3    | 6_29342775  | PCL-020*PCL-032         | 2           | Unpaired_SNV   | rs3749971     | COSM451127             | unknown                                |
| PDIA2     | 16_336888   | PCL-027*PCL-030         | 2           | Unpaired_INDEL | rs199887121   | COSM128704             | unknown                                |
| PKHD1     | 6_51910905  | PCL-030*PCL-017         | 2           | Unpaired_SNV   | rs62406032    | COSM150104             | unknown                                |
| PSG2      | 19_43585111 | PCL-030*PCL-032         | 2           | Unpaired_SNV   | rs149579909   | COSM328449, COSM328448 | unknown                                |
| PTTG1IP   | 21_46271460 | PCL-020*PCL-030*PCL-032 | 3           | Unpaired_SNV   | rs2236442     | COSM149244             | Previously Reported                    |
| QSER1     | 11_32955122 | PCL-036*PCL-032         | 2           | Unpaired_SNV   | rs2297781     | COSM147173             | Previously Reported                    |
| RETNLB    | 3_108475993 | PCL-027*PCL-032         | 2           | Unpaired_INDEL | rs5851607     | COSM1318744            | unknown                                |
| SLFN11    | 17_33679440 | PCL-036*PCL-020         | 2           | Unpaired_SNV   | rs62079540    | COSM148236             | unknown                                |
| SLFN11    | 17_33680811 | PCL-027*PCL-032         | 2           | Unpaired_SNV   | rs9898983     | COSM148239             | unknown                                |

(Continued)

| Gene Name | Chr_Start   | Samples                 | no. Samples | Flag                         | dbSNP137 rsID | COSMIC ID (v67)          | Somatic Status in COSMIC website       |
|-----------|-------------|-------------------------|-------------|------------------------------|---------------|--------------------------|----------------------------------------|
| SRRM5     | 19_44117582 | PCL-036*PCL-030*PCL-017 | 3           | Unpaired_SNV                 | rs10410000    | COSM439717               | Confirmed somatic, Previously reported |
| SRRM5     | 19_44118188 | PCL-036*PCL-030*PCL-017 | 3           | Unpaired_SNV                 | rs3815422     | COSM148658               | Confirmed somatic, Previously reported |
| TNRC6B    | 22_40697177 | PCL-036*PCL-017         | 2           | Unpaired_INDEL               | rs10617561    | COSM1034397, COSM1034396 | unknown                                |
| TRIM64B   | 11_89608899 | PCL-036*PCL-027         | 2           | Unpaired_SNV                 | rs201022110   | COSM1475960              | Confirmed Somatic, Previously Reported |
| ZHX2      | 8_123966085 | PCL-036*PCL-027         | 2           | Unpaired_SNV                 | rs3802264     | COSM150529               | unknown                                |
| ZNF598    | 16_2049882  | PCL-020*PCL-027*PCL-035 | 3           | Unpaired_INDEL               | rs141374045   | COSM307599               | Confirmed somatic, Previously reported |
| DCP1B     | 12_2062323  | PCL-038,PCL-032         | 2           | Paired_INDEL, Unpaired_INDEL | rs149912567   | COSM249162               | Confirmed Somatic, Previously Reported |
| IFT122    | 3_129214358 | PCL-016,PCL-035         | 2           | Paired_SNV, Unpaired_SNV     | rs73204230    | COSM1418827              | Previously Reported                    |
| VN1R4     | 19_53770746 | PCL-026,PCL-017         | 2           | Paired_SNV, Unpaired_SNV     | rs140031028   | COSM130160               | Previously Reported                    |

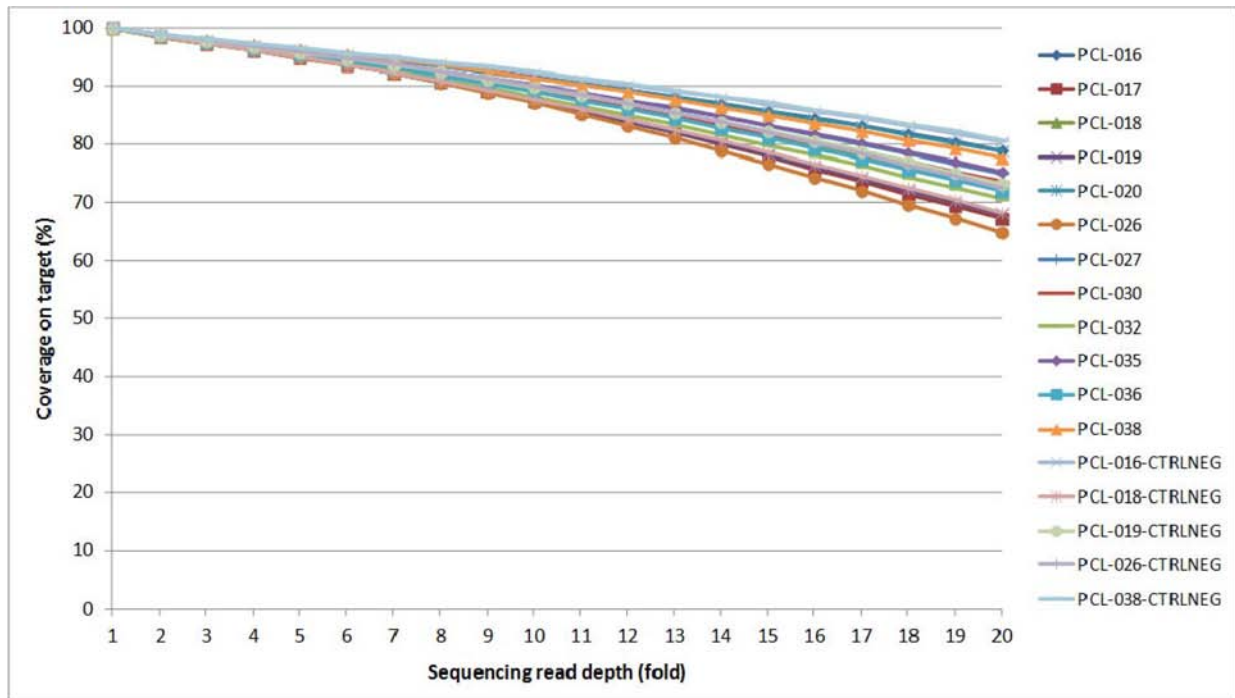

**Supplementary Figure S1: On target coverage in relation to read depth.** For each sample, mean coverage on target regions (totally 62 Mb) is plotted in relation to sequencing read depth. At 10x depth, all samples had at least 85% of target regions covered.

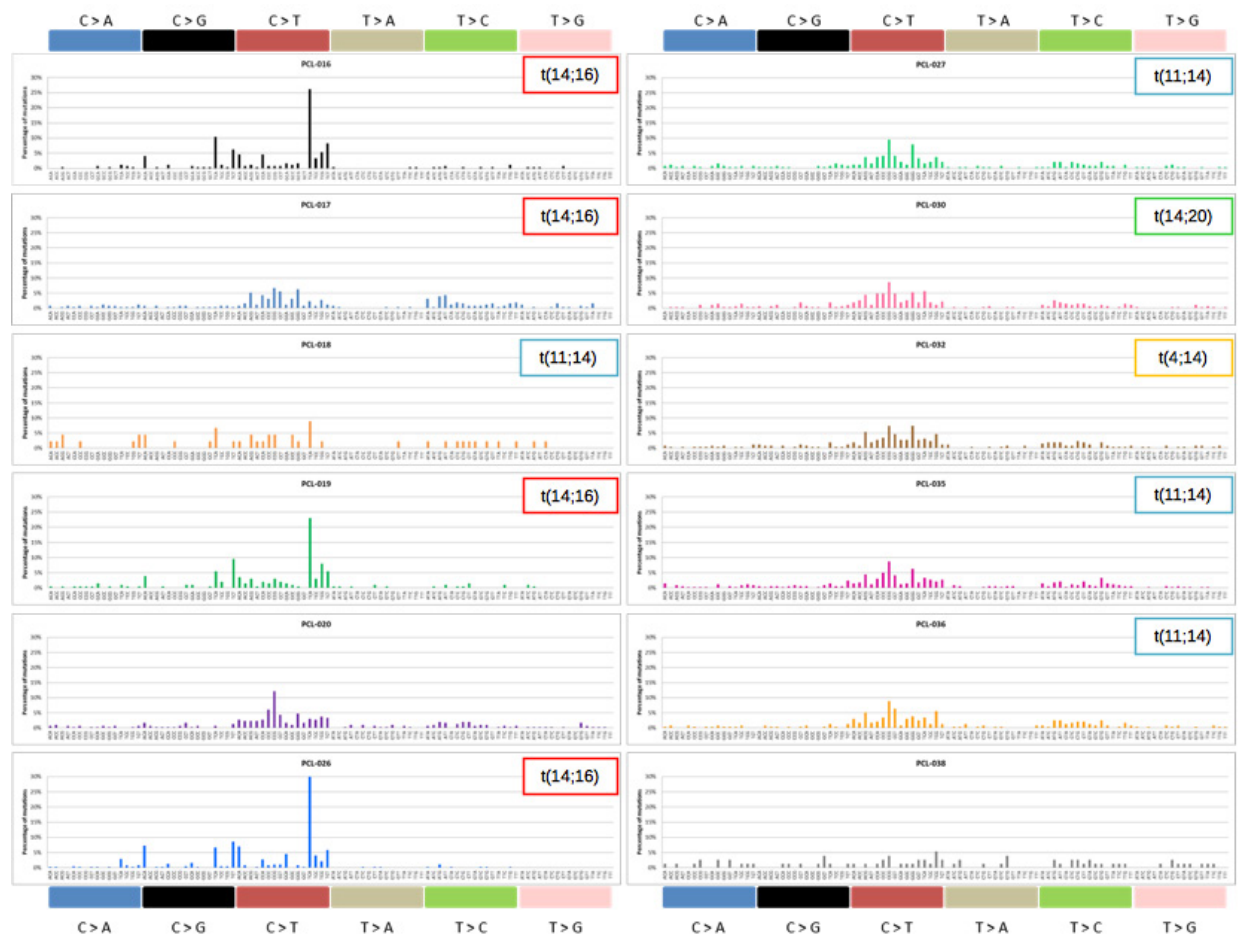

**Supplementary Figure S2: Mutational signatures for individual samples.** Coding somatic SNVs (both syn and non-syn) identified in each of the 12 pPCL samples were classified according to nucleotide change and sequence context into 96 possible mutated trinucleotides, whose relative contribution is represented for each sample. Substitutions are displayed along the horizontal axes and percentages of mutations attributed to each type are shown on the vertical axes. Translocations carried by each sample are reported as assessed by FISH.

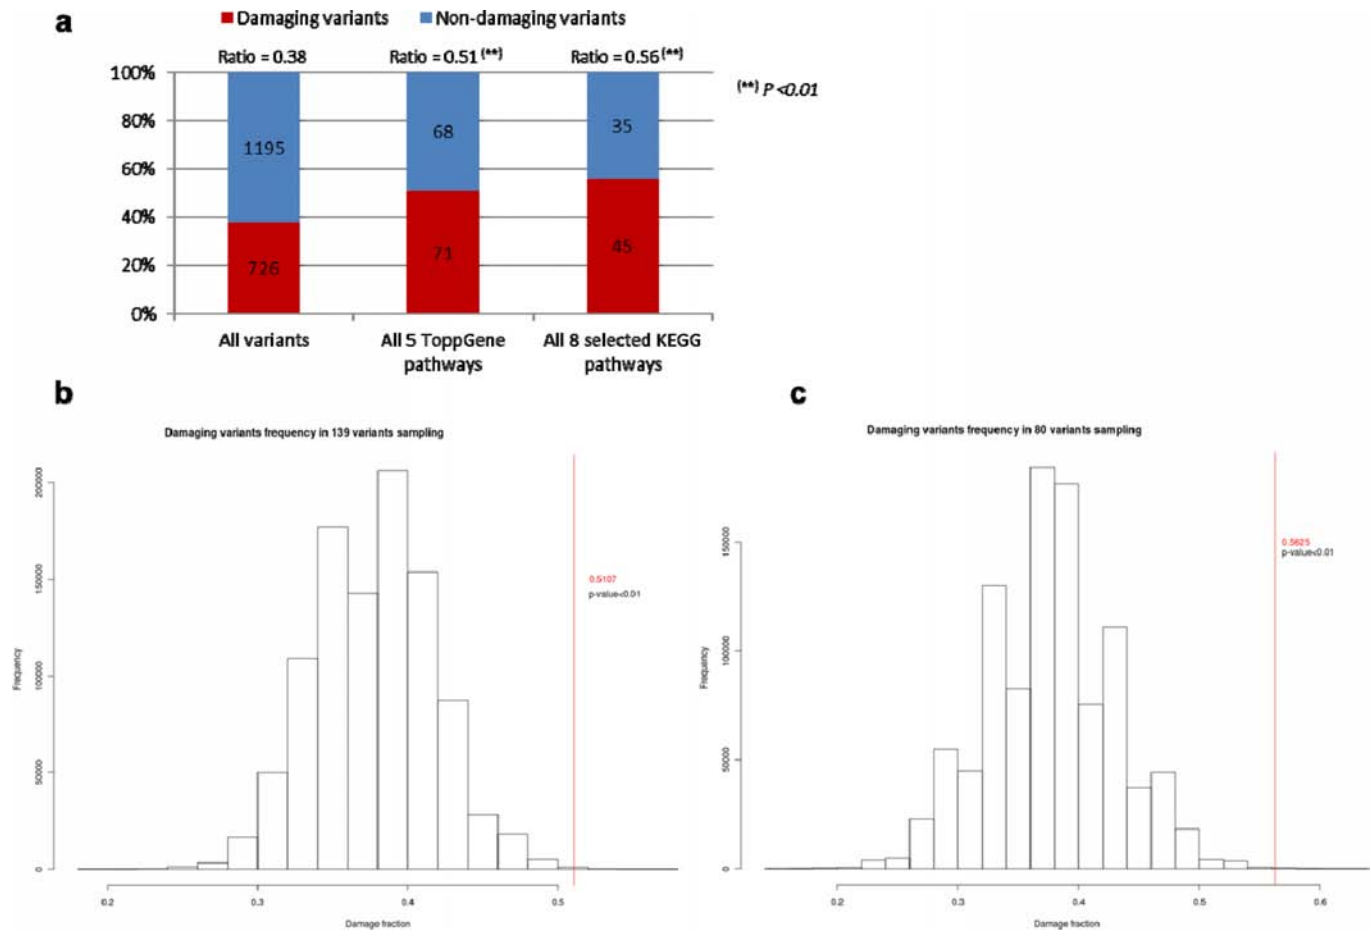

**Supplementary Figure S3: Resampling tests for damaging variants.** **A.** The ratio between damaging and non-damaging variants was calculated for the overall list of 1,928 coding somatic non-silent variants (used as background), and then for variants found in the five significantly enriched ToppGene pathways, and in the eight selected pathways. Variants were considered as damaging if they were SNVs predicted as deleterious by at least three out of five prediction algorithms included in Annovar tool, or frameshifting indels. Fisher exact test was applied to calculate enrichment with respect to background ratio ( $**p$ -value < 0.01). **B.** By performing random resampling (1,000,000 samplings) of 139 variants in our dataset, we obtained the damaging ratio distribution plot and calculated the probability of having the same fraction of damaging variants as that found in the five significantly enriched ToppGene pathways. Red vertical bar indicates the damaging ratio calculated for the five pathways ( $p$ -value < 0.01). **C.** By performing random resampling (1,000,000 samplings) of 80 variants in our dataset, we obtained the damaging ratio distribution plot and calculated the probability of having the same fraction of damaging variants as that found in the eight selected pathways. Red vertical bar indicates the damaging ratio calculated for the eight pathways ( $p$ -value < 0.01).
